# Supplementary material
Source: ML conference proceedings conference paper supplement (https://proceedings.neurips.cc/paper_files/paper/2014/hash/b3b43aeeacb258365cc69cdaf42a68af-Abstract.html)
Supplement: Supplementary file [file b3b43aeeacb258365cc69cdaf42a68af-Supplemental.zip]

---

# Discriminative Metric Learning by Neighborhood Gerrymandering (Supplementary Material)

---

Shubhendu Trivedi, David McAllester, Gregory Shakhnarovich  
Toyota Technological Institute  
Chicago, IL - 60637  
{shubhendu, mcallester, greg}@ttic.edu

## 1 Proof of correctness of Algorithm 2

First of all it is easy to see that Algorithm 2 terminates. There are  $k - n^*$  iterations after initialization (of the first  $n^*$  points) and this amounts to at most a linear scan of  $X$ . We need  $O(N \log N)$  time to sort the data and then finding  $h^*$  involves  $O(N)$ , thus the algorithm runs in time  $O(N \log N)$ .

We need to prove that the algorithm returns  $h^*$  as defined earlier. First, we establish the correctness of setting  $n^*$ :

**Proposition 1.** *Let  $R$  be the number of classes, and let  $\#(h, y)$  be the count of neighbors from target class  $y$  included in the assignment  $h$ . Then,  $\Delta(y^*, h) = 0$  only if  $\#(h, y^*) \geq n^*$ , where*

$$n^* = \begin{cases} \left\lceil \frac{k+R-1}{R} \right\rceil & \text{if ties not allowed,} \\ \left\lceil \frac{k}{R} \right\rceil & \text{if ties allowed.} \end{cases}$$

*We prove it below for the case with no ties; the proof when ties are allowed is very similar.*

*Proof.* Suppose by contradiction that  $\Delta(y^*, h) = 0$  and  $\#(h, y^*) \leq \left\lceil \frac{k+R-1}{R} \right\rceil - 1$ . Then, since no ties are allowed, for all  $y \neq y^*$ , we have  $\#(h, y^*) \leq \left\lceil \frac{k+R-1}{R} \right\rceil - 2$ , and

$$\sum_y \#(h, y) \leq (R-1) \left( \left\lceil \frac{k+R-1}{R} \right\rceil - 2 \right) \tag{1}$$

$$+ \left\lceil \frac{k+R-1}{R} \right\rceil - 1 \tag{2}$$

$$< k, \tag{3}$$

a contradiction to  $|h| = k$ . □

Next, we prove that the algorithm terminates and produces a correct result. For the purposes of complexity analysis, we consider  $R$  (but not  $k$ ) to be constant, and number of examples from each class to be  $O(N)$ .

**Claim 1.** *Algorithm 2 terminates after at most  $O((N + k) \log N)$  operations and produces an  $h$  such that  $|h| = k$ .*

*Proof.* The elements of  $X$  can be held in  $R$  priority queues, keyed by  $D_W$  values, one queue per class. Construction of this data structure is an  $O(N \log N)$  operation, carried out before the algorithm starts. To initialize  $h$  with  $n^*$  values, the algorithm retrieves  $n^*$  top elements from the priority queue for class  $y^*$ . An  $O(n^* \log N)$  operation. Then, for each of the iterations over  $l$ , the algorithm

needs to examine at most one top element from  $R$  queues, which costs  $O(\log N)$ ; each such iteration increases  $|h|$  by one. Thus after  $k - n^*$  iterations  $|h| = k$ ; the total cost is thus  $O(k \log N)$ . Combined with the complexity of data structure construction mentioned above, this concludes the proof.  $\square$

Note that for typical scenarios in which  $N \gg k$ , the cost will be dominated by the  $N \log N$  data structure setup.

**Claim 2.** Let  $h^*$  be returned by Algorithm 2. Then,

$$h^* = \underset{h: |h|=k, \Delta(y^*, h)=0}{\operatorname{argmax}} S_{\mathbf{W}}(\mathbf{x}, h), \quad (4)$$

i.e., the algorithm finds the highest scoring  $h$  with total of  $k$  neighbors among those  $h$  that attain zero loss.

*Proof.* From Proposition 1 we know that if  $\#(h, y) < n^*$ , then  $h$  does not satisfy the  $\Delta(\mathbf{x}, h) = 0$  condition.  $|h| \geq n^*$  to (4) without altering the definition.

We will call  $h$  “optimal for  $l$ ” if

$$h = \underset{h: |h|=n^*+l, \#(h, y) \geq n^*, \Delta(y^*, h)=0}{\operatorname{argmax}} S_{\mathbf{W}}(\mathbf{x}, h).$$

We now prove by induction over  $l$  that this property is maintained through the loop over  $l$  in the algorithm.

Let  $h^{(j)}$  denote choice of  $h$  after  $j$  iterations of the loop, i.e.,  $|h| = n^* + j$ . Suppose that  $h^{(l-1)}$  is optimal for  $l - 1$ . Now the algorithm selects  $\mathbf{x}_a \in X$ , such that

$$\mathbf{x}_a = \underset{\mathbf{x}_i: y_i=y, \text{ or } \#(y_i) < \#(y) - \tau, \mathbf{x}_i \notin h}{\operatorname{argmin}} D_{\mathbf{W}}(\mathbf{x}, \mathbf{x}_i). \quad (5)$$

Suppose that  $h^{(l)}$  is not optimal for  $l$ . Then there exists an  $\mathbf{x}_b \in X$  for which  $D_{\mathbf{W}}(\mathbf{x}, \mathbf{x}_b) < D_{\mathbf{W}}(\mathbf{x}, \mathbf{x}_a)$  such that picking  $\mathbf{x}_b$  instead of  $\mathbf{x}_a$  would produce  $h$  optimal for  $l$ . But  $\mathbf{x}_b$  is not picked by the algorithm; this can only happen if conditions on the argmin in (5) are violated, namely, if  $\#(y_b) = \#(y) - \tau$ ; therefore picking  $\mathbf{x}_b$  would violate conditions of optimality of  $h^{(l)}$ , and we get a contradiction.

It is also clear that after initialization with  $k$  highest scoring neighbors in  $y^*$ ,  $h$  is optimal for  $l = 0$ , which forms the base of induction. We conclude that  $h^{(k-n^*)}$ , i.e. the result of the algorithm, is optimal for  $k - n^*$ , which is equivalent to definition in (4).  $\square$

## 2 Runtimes using different methods

Here we include the training times in seconds for one fold of each dataset. These timings are for a single partition, for optimal parameters for  $k = 7$ . These experiments were run on a 12-core Intel Xeon E5-2630 v2 @ 2.60GHz.

| Dataset | DSLR   | Caltech | Amazon | Webcam | Letters | USPS   | Isolet |
|---------|--------|---------|--------|--------|---------|--------|--------|
| LMNN    | 358.11 | 1812.1  | 1545.1 | 518.7  | 179.77  | 782.66 | 1762.1 |
| GB-LMNN | 410.13 | 1976.4  | 1680.9 | 591.29 | 272.87  | 3672.9 | 2882.6 |
| MLR     | 4.93   | 124.42  | 88.96  | 85.02  | 838.13  | 1281   | 33.20  |
| MLNG    | 413.36 | 1027.6  | 2157.2 | 578.74 | 6657.3  | 3891.7 | 3668.9 |

### 3 Experimental results using different feature normalizations

| k = 3     |        |      |         |                         |                        |                        |                        |
|-----------|--------|------|---------|-------------------------|------------------------|------------------------|------------------------|
| Dataset   | Isolet | USPS | letters | DSLR                    | Amazon                 | Webcam                 | Caltech                |
| $d$       | 170    | 256  | 16      | 800                     | 800                    | 800                    | 800                    |
| $N$       | 7797   | 9298 | 20000   | 157                     | 958                    | 295                    | 1123                   |
| $C$       | 26     | 10   | 26      | 10                      | 10                     | 10                     | 10                     |
| Euclidean | -      | -    | -       | 26.71 $\pm$ 11          | 37.26 $\pm$ 2.3        | 23.39 $\pm$ 5.3        | 58.42 $\pm$ 3.7        |
| LMNN      | -      | -    | -       | 23.53 $\pm$ 7.6         | <b>26.30</b> $\pm$ 1.6 | <b>11.53</b> $\pm$ 6.7 | 43.72 $\pm$ 3.5        |
| GB-LMNN   | -      | -    | -       | 23.53 $\pm$ 7.6         | <b>26.30</b> $\pm$ 1.6 | <b>11.53</b> $\pm$ 6.7 | <b>43.54</b> $\pm$ 3.5 |
| MLR       | -      | -    | -       | 24.78 $\pm$ 14.2        | 32.35 $\pm$ 4.5        | 14.58 $\pm$ 3.5        | 52.18 $\pm$ 2.0        |
| ITML      | -      | -    | -       | 22.22 $\pm$ 9.9         | 32.67 $\pm$ 3.2        | 12.88 $\pm$ 6.1        | 51.74 $\pm$ 4.2        |
| NCA       | -      | -    | -       | 29.84 $\pm$ 8.1         | 33.72 $\pm$ 2.1        | 21.36 $\pm$ 4.9        | 54.50 $\pm$ 2.0        |
| ours      | -      | -    | -       | <b>21.63</b> $\pm$ 6.1  | 29.23 $\pm$ 2.8        | 14.58 $\pm$ 5.4        | 46.46 $\pm$ 2.4        |
| k = 7     |        |      |         |                         |                        |                        |                        |
| Dataset   | Isolet | USPS | letters | DSLR                    | Amazon                 | Webcam                 | Caltech                |
| Euclidean | -      | -    | -       | 32.46 $\pm$ 8.3         | 38.2 $\pm$ 1.6         | 27.46 $\pm$ 5.9        | 56.9 $\pm$ 2.9         |
| LMNN      | -      | -    | -       | 26.11 $\pm$ 8.6         | 25.47 $\pm$ 1.6        | <b>10.51</b> $\pm$ 4.9 | 41.77 $\pm$ 4.0        |
| GB-LMNN   | -      | -    | -       | <b>25.48</b> $\pm$ 10.9 | <b>25.36</b> $\pm$ 1.7 | <b>10.51</b> $\pm$ 4.9 | <b>41.59</b> $\pm$ 3.6 |
| MLR       | -      | -    | -       | 27.94 $\pm$ 9.0         | 30.16 $\pm$ 3.0        | 16.95 $\pm$ 3.4        | 49.51 $\pm$ 3.6        |
| ITML      | -      | -    | -       | 22.28 $\pm$ 8.8         | 32.88 $\pm$ 3.3        | 13.90 $\pm$ 6.3        | 50.59 $\pm$ 4.7        |
| NCA       | -      | -    | -       | 37.48 $\pm$ 8.2         | 33.09 $\pm$ 1.9        | 23.39 $\pm$ 5.3        | 51.74 $\pm$ 2.6        |
| ours      | -      | -    | -       | <b>25.65</b> $\pm$ 7.1  | 28.65 $\pm$ 2.3        | 17.29 $\pm$ 5.0        | 48.62 $\pm$ 1.7        |
| k = 11    |        |      |         |                         |                        |                        |                        |
| Dataset   | Isolet | USPS | letters | DSLR                    | Amazon                 | Webcam                 | Caltech                |
| Euclidean | -      | -    | -       | 35.02 $\pm$ 8.9         | 37.57 $\pm$ 2.3        | 30.51 $\pm$ 4.8        | 56.55 $\pm$ 2.4        |
| LMNN      | -      | -    | -       | 49.64 $\pm$ 5.7         | <b>24.84</b> $\pm$ 2.1 | <b>10.17</b> $\pm$ 3.8 | 43.19 $\pm$ 2.7        |
| GB-LMNN   | -      | -    | -       | 43.89 $\pm$ 5.6         | 25.16 $\pm$ 2.0        | <b>10.17</b> $\pm$ 3.8 | <b>43.10</b> $\pm$ 3.1 |
| MLR       | -      | -    | -       | 28.63 $\pm$ 7.7         | 30.48 $\pm$ 2.4        | 17.63 $\pm$ 5.3        | 48.18 $\pm$ 3.8        |
| ITML      | -      | -    | -       | <b>24.82</b> $\pm$ 5.1  | 31.10 $\pm$ 2.6        | 15.25 $\pm$ 6.3        | 50.32 $\pm$ 3.9        |
| NCA       | -      | -    | -       | 41.37 $\pm$ 4.7         | 32.88 $\pm$ 1.5        | 24.07 $\pm$ 8.4        | 51.20 $\pm$ 3.9        |
| ours      | -      | -    | -       | 32.44 $\pm$ 6.7         | 32.15 $\pm$ 2.8        | 17.65 $\pm$ 3.5        | 49.60 $\pm$ 2.6        |

Table 1:  $k$ NN error, for  $k=3, 7$  and  $11$ . Mean and standard deviation are shown for data sets on which 5-fold partition was used. These experiments were done after histogram normalization. Best performing methods are shown in bold. Note that the only non-linear metric learning method in the above is GB-LMNN

k = 3

| Dataset   | Isolet      | USPS        | letters          | DSLR                   | Amazon                 | Webcam                 | Caltech                |
|-----------|-------------|-------------|------------------|------------------------|------------------------|------------------------|------------------------|
| <i>d</i>  | 170         | 256         | 16               | 800                    | 800                    | 800                    | 800                    |
| <i>N</i>  | 7797        | 9298        | 20000            | 157                    | 958                    | 295                    | 1123                   |
| <i>C</i>  | 26          | 10          | 26               | 10                     | 10                     | 10                     | 10                     |
| Euclidean | 8.98        | 5.03        | 4.31 $\pm 0.2$   | 58.01 $\pm 5.0$        | 56.89 $\pm 2.4$        | 40.34 $\pm 4.2$        | 74.89 $\pm 3.2$        |
| LMNN      | 4.17        | 5.38        | 3.26 $\pm 0.1$   | 23.53 $\pm 5.6$        | 28.08 $\pm 2.2$        | <b>11.19</b> $\pm 5.6$ | 44.97 $\pm 2.6$        |
| GB-LMNN   | <b>3.72</b> | 5.03        | 2.50 $\pm 0.2$   | 23.53 $\pm 5.6$        | 28.08 $\pm 2.2$        | 11.53 $\pm 5.5$        | 44.70 $\pm 2.4$        |
| MLR       | 17.32       | 8.42        | 45.70 $\pm 18.7$ | 35.69 $\pm 7.6$        | <b>23.40</b> $\pm 1.7$ | 20 $\pm 4.6$           | 47.11 $\pm 1.7$        |
| ITML      | 6.86        | <b>4.78</b> | 4.35 $\pm 0.2$   | 24.82 $\pm 10.9$       | 34.77 $\pm 4.7$        | 12.20 $\pm 4.1$        | 53.97 $\pm 3.2$        |
| NCA       | 5.07        | 5.18        | 4.39 $\pm 1.1$   | 24.19 $\pm 5.8$        | 29.54 $\pm 1.4$        | 12.88 $\pm 4.9$        | 46.84 $\pm 2.0$        |
| ours      | 4.11        | 5.13        | 2.84 $\pm 0.2$   | <b>22.77</b> $\pm 5.9$ | 27.84 $\pm 2.4$        | 14.58 $\pm 3.9$        | <b>44.54</b> $\pm 2.9$ |

k = 7

| Dataset   | Isolet      | USPS        | letters          | DSLR                   | Amazon                 | Webcam                 | Caltech                |
|-----------|-------------|-------------|------------------|------------------------|------------------------|------------------------|------------------------|
| Euclidean | 6.93        | 5.08        | 4.69 $\pm 0.2$   | 60.46 $\pm 5.2$        | 59.07 $\pm 4.5$        | 43.05 $\pm 3.7$        | 72.3 $\pm 3.3$         |
| LMNN      | 4.04        | 5.28        | 3.53 $\pm 0.2$   | 24.15 $\pm 9.0$        | 28.19 $\pm 2.8$        | 13.56 $\pm 4.5$        | 43.90 $\pm 2.4$        |
| GB-LMNN   | <b>3.72</b> | 5.03        | 2.32 $\pm 0.2$   | 24.80 $\pm 8.1$        | 28.29 $\pm 3.1$        | 13.14 $\pm 5.8$        | 43.54 $\pm 2.2$        |
| MLR       | 23.28       | 8.12        | 33.61 $\pm 16.8$ | 38.17 $\pm 10.9$       | <b>23.79</b> $\pm 3.9$ | 20.34 $\pm 2.9$        | 45.60 $\pm 4.8$        |
| ITML      | 5.90        | 5.23        | 4.93 $\pm 0.5$   | <b>23.57</b> $\pm 9.6$ | 32.46 $\pm 3.2$        | <b>11.19</b> $\pm 5.7$ | 52.63 $\pm 3.3$        |
| NCA       | 5.52        | 4.98        | 5.06 $\pm 1.1$   | 37.58 $\pm 5.7$        | 31.01 $\pm 2.0$        | 16.81 $\pm 5.9$        | 43.90 $\pm 2.4$        |
| ours      | 4.07        | <b>4.93</b> | 3.13 $\pm 0.2$   | 29.94 $\pm 7.6$        | 27.62 $\pm 3.4$        | 13.24 $\pm 3.1$        | <b>42.83</b> $\pm 3.1$ |

k = 11

| Dataset   | Isolet      | USPS        | letters               | DSLR                   | Amazon                 | Webcam                 | Caltech                |
|-----------|-------------|-------------|-----------------------|------------------------|------------------------|------------------------|------------------------|
| Euclidean | 7.95        | 5.68        | 5.26 $\pm 0.2$        | 61.71 $\pm 6.4$        | 61.48 $\pm 3.7$        | 49.15 $\pm 3.9$        | 73.1 $\pm 3.6$         |
| LMNN      | <b>3.85</b> | 5.73        | 4.09 $\pm 0.2$        | 49.6 $\pm 5.5$         | 27.04 $\pm 1.8$        | 14.58 $\pm 4.6$        | 44.61 $\pm 1.3$        |
| GB-LMNN   | 3.98        | 6.33        | <b>2.96</b> $\pm 0.1$ | 45.18 $\pm 10.5$       | 27.25 $\pm 2.2$        | 14.58 $\pm 4.6$        | 45.55 $\pm 6.9$        |
| MLR       | 33.61       | 10.26       | 35.50 $\pm 16.5$      | 34.40 $\pm 8.2$        | <b>24.21</b> $\pm 3.4$ | 18.31 $\pm 5.3$        | 46.04 $\pm 1.9$        |
| ITML      | 7.18        | 5.88        | 5.35 $\pm 0.3$        | 28.04 $\pm 7.7$        | 33.09 $\pm 2.1$        | <b>12.54</b> $\pm 5.4$ | 51.91 $\pm 3.3$        |
| NCA       | 5.52        | 5.03        | 5.8 $\pm 1.3$         | 45.18 $\pm 6.5$        | 32.47 $\pm 1.7$        | 19.32 $\pm 7.5$        | <b>44.17</b> $\pm 2.6$ |
| ours      | 3.87        | <b>4.98</b> | 3.28 $\pm 0.4$        | <b>27.50</b> $\pm 8.1$ | 27.91 $\pm 3.5$        | 14.24 $\pm 6.5$        | 45.76 $\pm 2.9$        |

Table 2:  $k$ NN error, for  $k=3, 7$  and 11. No feature scaling was applied in these experiments. Mean and standard deviation are shown for data sets on which 5-fold partition was used. Best performing methods are shown in bold. Note that the only non-linear metric learning method in the above is GB-LMNN.
